# Supplementary material for: Imaging quantized vortex rings in superfluid helium to evaluate quantum dissipation
Source: PubMed Central journal article supplement (PMC10205744; doi:10.1038/s41467-023-38787-w), 2023-05-23
Supplement: 41467_2023_38787_MOESM1_ESM.pdf [file 41467_2023_38787_MOESM1_ESM.pdf]

# Supplementary Information: Imaging quantized vortex rings in superfluid helium to evaluate quantum dissipation

Yuan Tang,<sup>1,2</sup> Wei Guo,<sup>1,2,\*</sup> Hiromichi Kobayashi,<sup>3,4</sup>  
Satoshi Yui,<sup>5,6</sup> Makoto Tsubota,<sup>5,6</sup> and Toshiaki Kanai<sup>1,7</sup>

<sup>1</sup>*National High Magnetic Field Laboratory,  
1800 East Paul Dirac Drive, Tallahassee, FL 32310, USA*

<sup>2</sup>*Mechanical Engineering Department,  
FAMU-FSU College of Engineering,*

*Florida State University, Tallahassee, FL 32310, USA*

<sup>3</sup>*Research and Education Center for Natural Sciences, Keio University,  
4-1-1 Hiyoshi, Kohoku-ku, Yokohama 223-8521, Japan*

<sup>4</sup>*Department of Physics, Hiyoshi Campus, Keio University,  
4-1-1 Hiyoshi, Kohoku-ku, Yokohama 223-8521, Japan*

<sup>5</sup>*Department of Physics, Osaka Metropolitan University,  
3-3-138 Sugimoto, Sumiyoshi-ku, Osaka 558-8585, Japan*

<sup>6</sup>*Nambu Yoichiro Institute of Theoretical and Experimental Physics (NITEP),  
Osaka Metropolitan University, Osaka 558-8585, Japan*

<sup>7</sup>*Department of Physics, Florida State University, Tallahassee, FL 32306, USA*

---

\* Email: wguo@magnet.fsu.edu

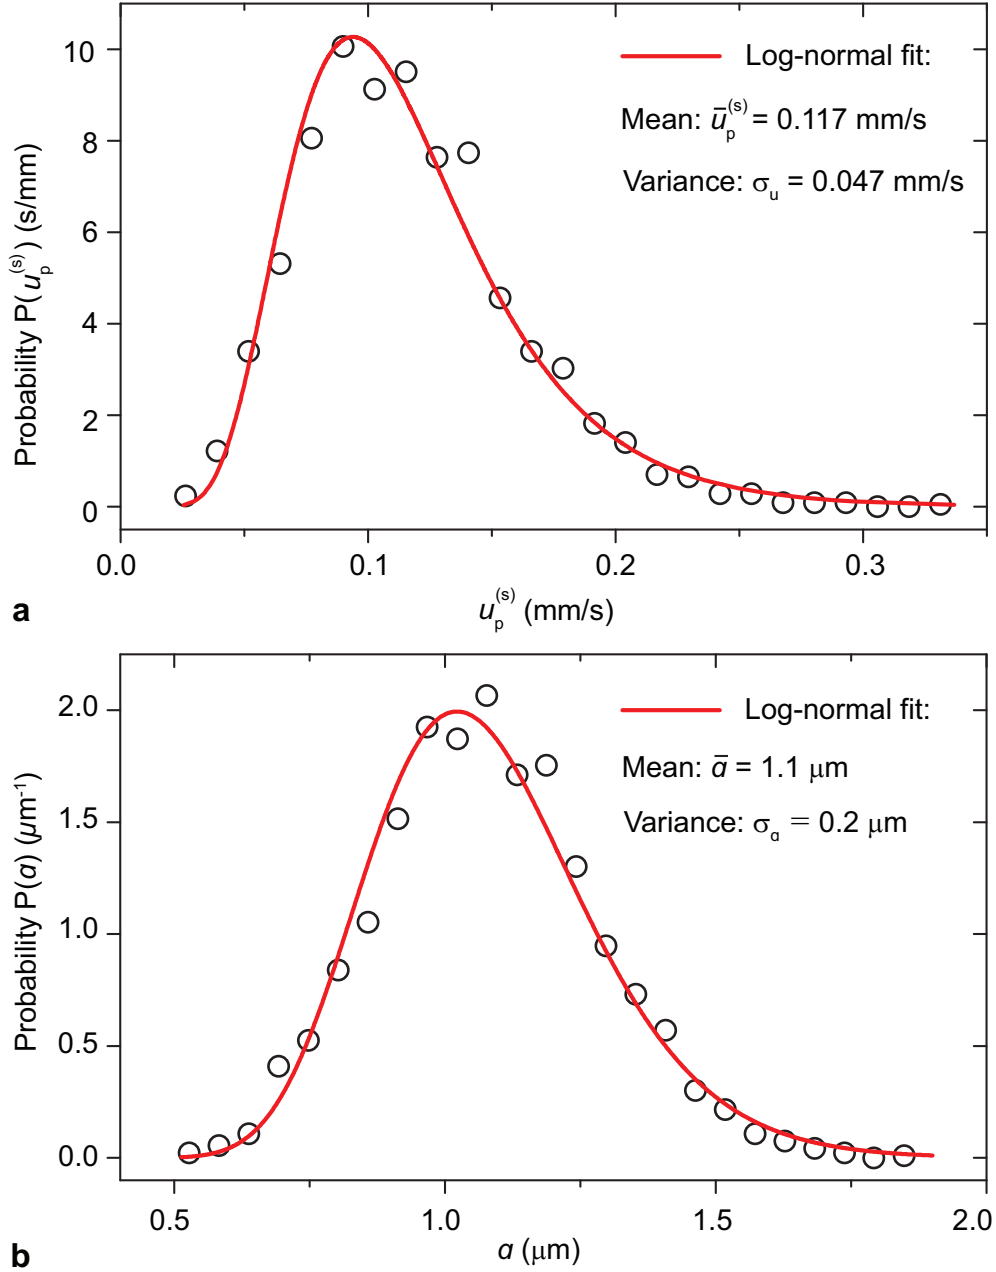

Supplementary Fig. 1. Settling velocity and radius distribution of the  $\text{D}_2$  particles in He II at  $T=1.65$  K. **a**, Distribution of the settling velocity  $u_p^{(s)}$ . **b**, Distribution of the particle radius  $a$ .

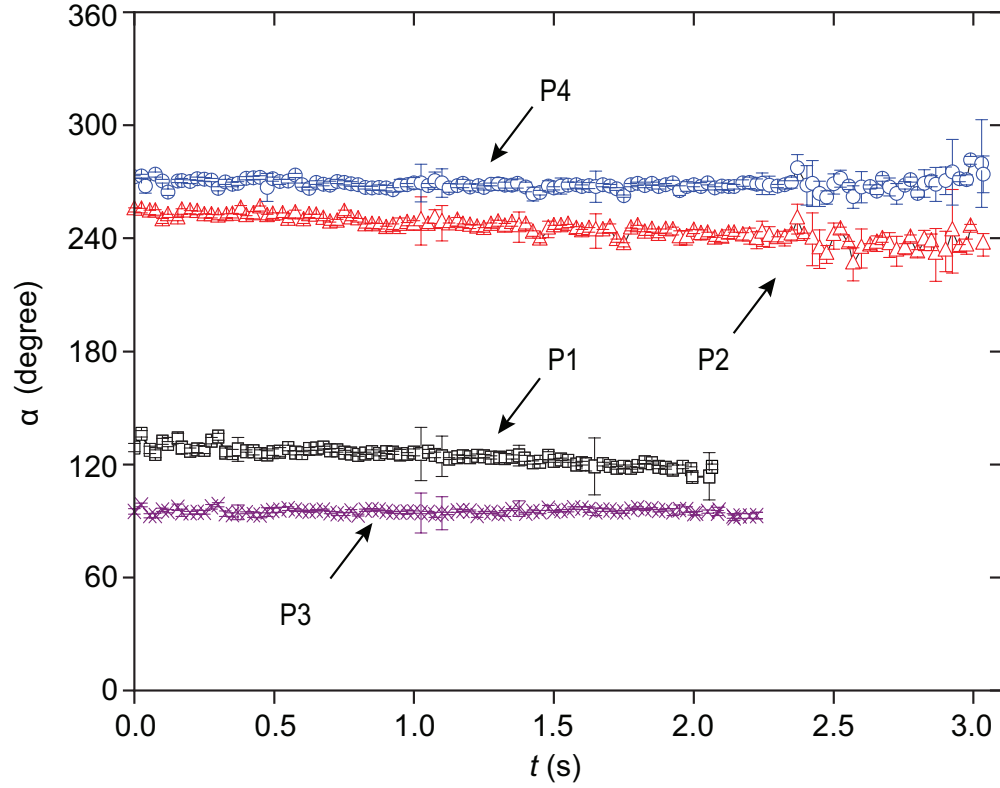

**Supplementary Fig. 2. Time evolution of the angular position  $\alpha$  of representative trapped particles for the 9-particle ring event.** The definition of the angle  $\alpha$  is given in the main text. The error bars denote the standard deviation associated with the data due to the uncertainties of the particle positions.

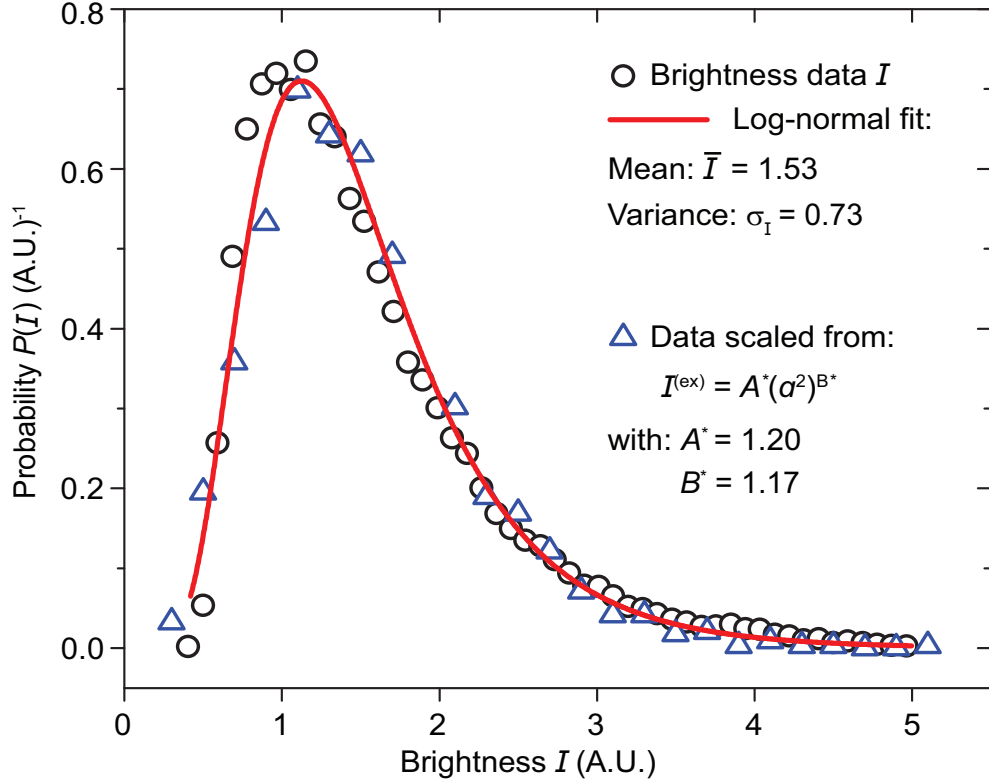

**Supplementary Fig. 3. Distribution of the brightness  $I$  of the  $D_2$  particles.** The black circles represent the measured brightness  $I$ . The blue triangles are  $I^{(\text{ex})}$  calculated using the distribution of particle radius  $a$ , where  $A^* = 1.20$  and  $B^* = 1.17$  are the optimal correlation parameters that render the best agreement between the two distributions.

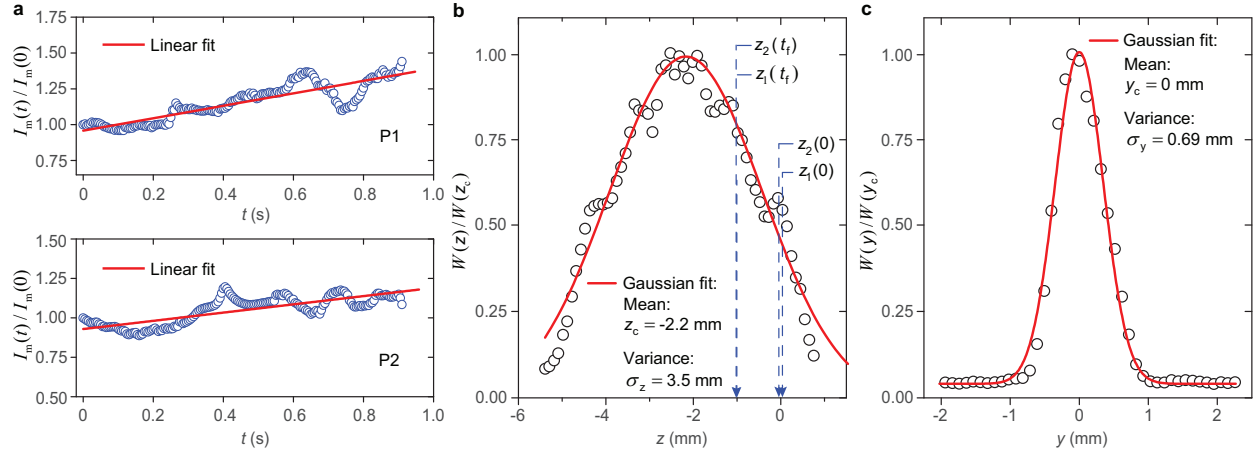

**Supplementary Fig. 4. Trapped particle's brightness variation and laser-intensity cross-sectional profile.** **a**, Time variation of the directly measured brightness  $I_m(t)$  of the two trapped particles as shown in **Fig.2a**. **b**, Measured laser intensity  $W$  as a function of  $z$  (i.e., height direction). The red curve is a Gaussian fit to the data. The  $z$ -coordinates of the two particles at  $t = 0$  and  $t = t_f$  are indicated. **c**, Measured laser intensity  $W$  as a function of  $y$  (i.e., thickness direction).

**Supplementary Table. 1.** Radiuses and initial positions of the trapped particles for the 9-particle vortex ring in **Fig.1** and the 2-particle vortex ring in **Fig.2**.

| 9-p ring | $x$ (mm) | $\Delta x$ (mm) | $y$ (mm) | $\Delta y$ (mm) | $z$ (mm) | $\Delta z$ (mm) | $a$ ( $\mu\text{m}$ ) | $\Delta a$ ( $\mu\text{m}$ ) |
|----------|----------|-----------------|----------|-----------------|----------|-----------------|-----------------------|------------------------------|
| P1       | -0.271   | 0.003           | -0.209   | 0.005           | 0.204    | 0.002           | 0.87                  | 0.18                         |
| P2       | -0.186   | 0.002           | 0.261    | 0.004           | -0.074   | 0.002           | 1.32                  | 0.53                         |
| P3       | -0.101   | 0.003           | -0.269   | 0.005           | 0.220    | 0.002           | 1.04                  | 0.30                         |
| P4       | -0.093   | 0.002           | 0.270    | 0.004           | -0.089   | 0.002           | 1.69                  | 0.38                         |
| P5       | -0.008   | 0.002           | 0.254    | 0.003           | -0.089   | 0.002           | 1.74                  | 0.33                         |
| P6       | 0.154    | 0.003           | 0.155    | 0.004           | -0.051   | 0.002           | 1.03                  | 0.37                         |
| P7       | 0.215    | 0.002           | 0.027    | 0.003           | 0.016    | 0.002           | 0.92                  | 0.26                         |
| P8       | -0.358   | 0.002           | 0.146    | 0.005           | 0.011    | 0.003           | 0.78                  | 0.19                         |
| P9       | 0.216    | 0.002           | -0.046   | 0.003           | 0.058    | 0.002           | 1.09                  | 0.24                         |
| 2-p ring | $x$ (mm) | $\Delta x$ (mm) | $y$ (mm) | $\Delta y$ (mm) | $z$ (mm) | $\Delta z$ (mm) | $a$ ( $\mu\text{m}$ ) | $\Delta a$ ( $\mu\text{m}$ ) |
| P1       | -0.008   | 0.005           | –        | –               | 0.047    | 0.004           | 1.18                  | 0.08                         |
| P2       | 0.271    | 0.004           | –        | –               | -0.047   | 0.004           | 1.12                  | 0.07                         |
