# Supplementary material for: Imaging quantized vortex rings in superfluid helium to evaluate quantum dissipation
Source: PubMed Central journal article supplement (PMC10205744; doi:10.1038/s41467-023-38787-w), 2023-05-23
Supplement: 41467_2023_38787_MOESM3_ESM.pdf [file 41467_2023_38787_MOESM3_ESM.pdf]

**File name: Supplementary Movie 1**

**Description:** A movie consisting of a few short video clips showing the propagation of representative quantized vortex rings in superfluid helium-4. These quantized vortex rings are visualized by imaging the trapped  $D_{2}$  tracer particles.

**File name: Supplementary Movie 2**

**Description:** A movie consisting of a few short video clips showing how quantized vortex rings are created as a consequence of reconnections of intersecting quantized vortex lines in superfluid helium-4.

**File name: Supplementary Movie 3**

**Description:** A movie showing the motion of a quantized vortex ring which carries nine discrete  $D_{2}$  tracer particles moving through quiescent superfluid helium-4. This event is analyzed and presented in Fig.1 in the paper.

**File name: Supplementary Movie 4**

**Description:** A movie consisting of three short video clips showing three representative vortex-ring events where only two  $D_{2}$  tracer particles are trapped on the vortex ring. For these events, the background flow of superfluid helium-4 is negligible. The analysis results of the first 2-particle vortex-ring event is presented in Fig. 2 in the paper.

**File name: Supplementary Movie 5**

**Description:** A movie consisting of a few short video clips showing representative vortex-ring events where the rings heavily doped with  $D_{2}$  tracer particles spontaneously flip to the downward direction while they propagate and shrink in superfluid helium-4. The analysis of the first event is presented in Fig.3 in the paper.

**File name: Supplementary Movie 6**

**Description:** A movie consisting of a few short video clips showing representative vortex ring events where the trapped  $D_{2}$  tracer particles detach from the vortex core due to the Stokes drag from the normal fluid, as the ring diminishes. The detached particles then aggregate to form a cluster that slowly falls in superfluid helium-4. The analysis of the first event is presented in Fig.3 in the paper.

**File name: Supplementary Movie 7**

**Description:** A representative movie showing the settling motion of  $D_{2}$  tracer particles in quiescent superfluid helium-4. This movie is taken in the same experiment run as the 9-particle ring event and the 2-particle ring event presented in the paper.
